# Supplementary material for: Synthesis, structure, fluorescent and magnetic properties of a series of coordination polymers based on a long and flexible bis-triazole ligand
Source: Royal Society of Chemistry journal article supplement (doi:10.1039/c2ce06290a), 2012-01-01
Supplement: c2ce06290a.pdf [file c2ce06290a.pdf]

# Supporting Information

## Synthesis, Structure, Fluorescent and Magnetic Properties of a Series of Coordination Polymers Based on a Long and Flexible Bis-triazole Ligand

Nan Wang, Yue-Chao Feng, Wei Shi, Bin Zhao, Peng Cheng\*, Dai-Zheng Liao and Shi-Ping Yan

*Department of Chemistry and Key Laboratory of Advanced Energy Materials Chemistry (MOE),  
Nankai University, Tianjin 300071, China*

### Catalogue:

Fig. S1 The PXRD patterns of compounds **1-6**.

Fig. S2 The plots of TGA for compounds **1-6**.

Fig. S3 The decay curves for BTPM and compounds **1-4**.

Table S1 Selected bond lengths (Å) and angles (°) for compounds **1-6**.

Table S2 The overall formula, formula weight, density and F(000) for **1** and **2**.

---

\* Corresponding author. E-mail: [pcheng@nankai.edu.cn](mailto:pcheng@nankai.edu.cn).

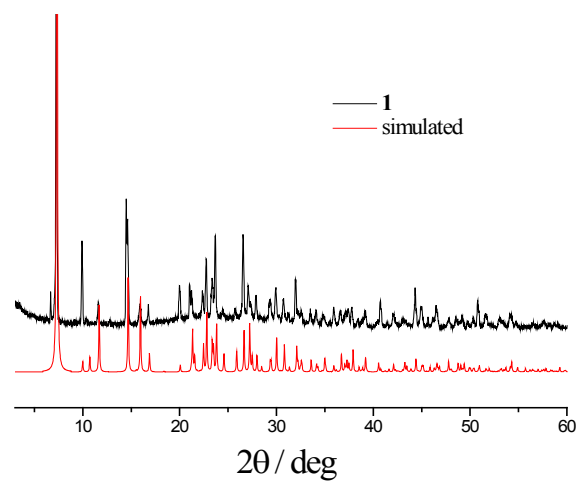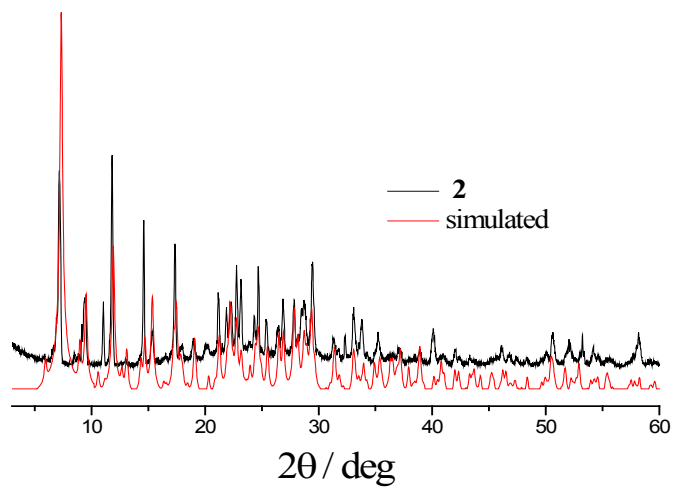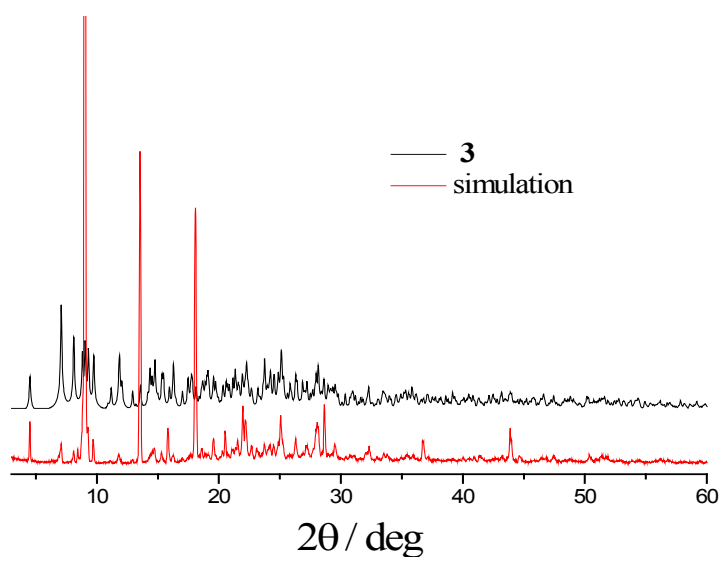

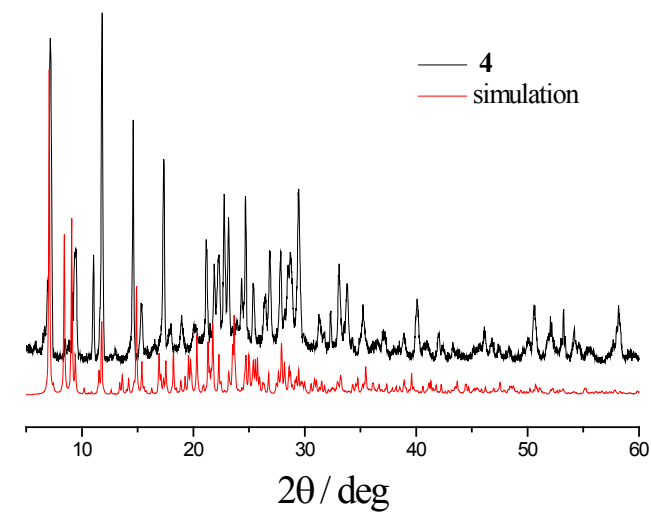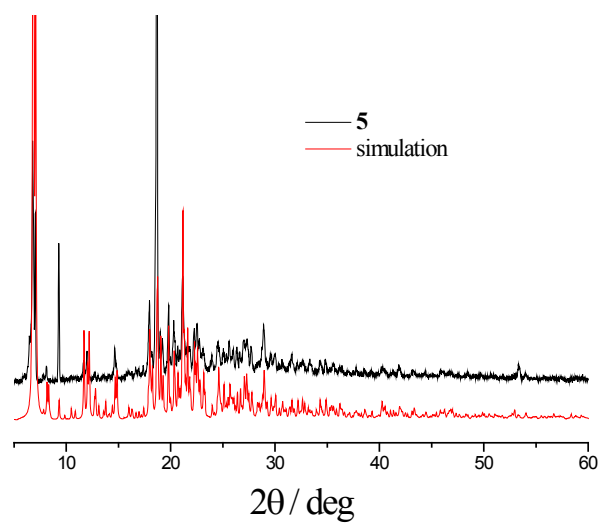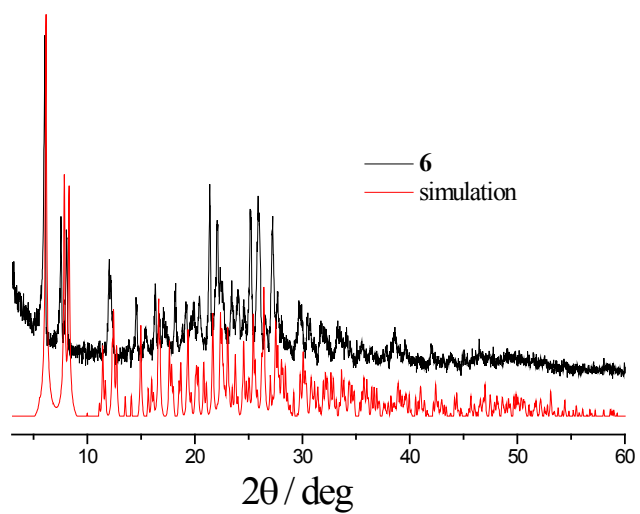

Fig. S1 The PXRD patterns of compounds 1-6.

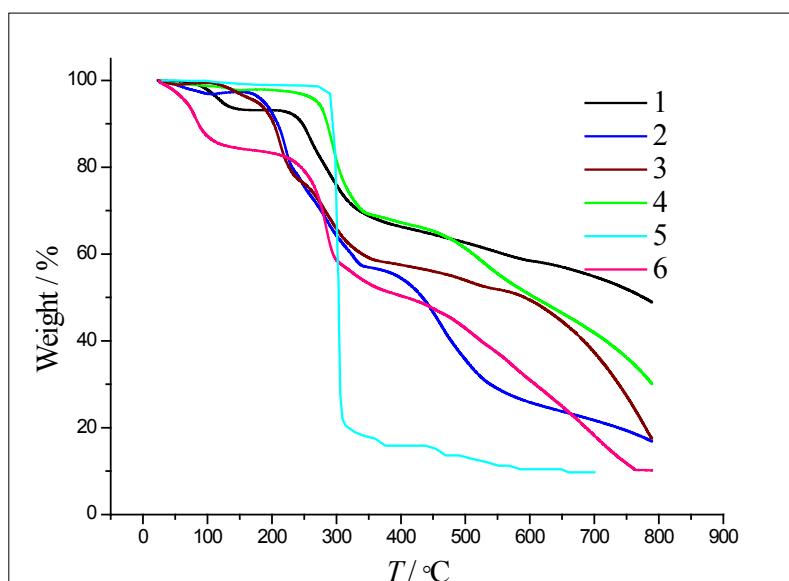

Fig. S2 The plots of TGA for compounds 1-6.

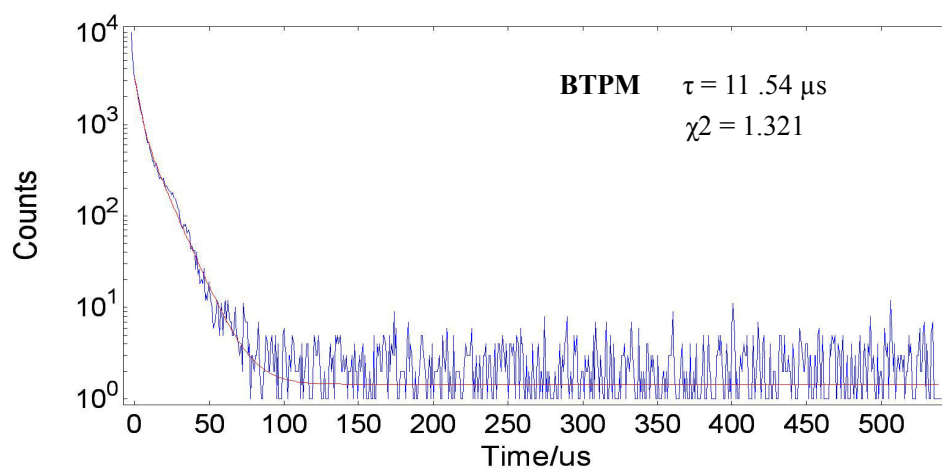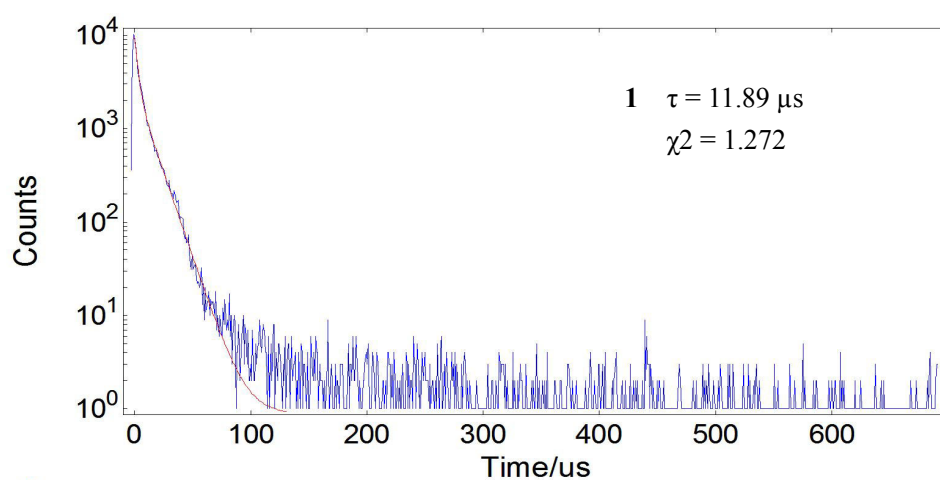

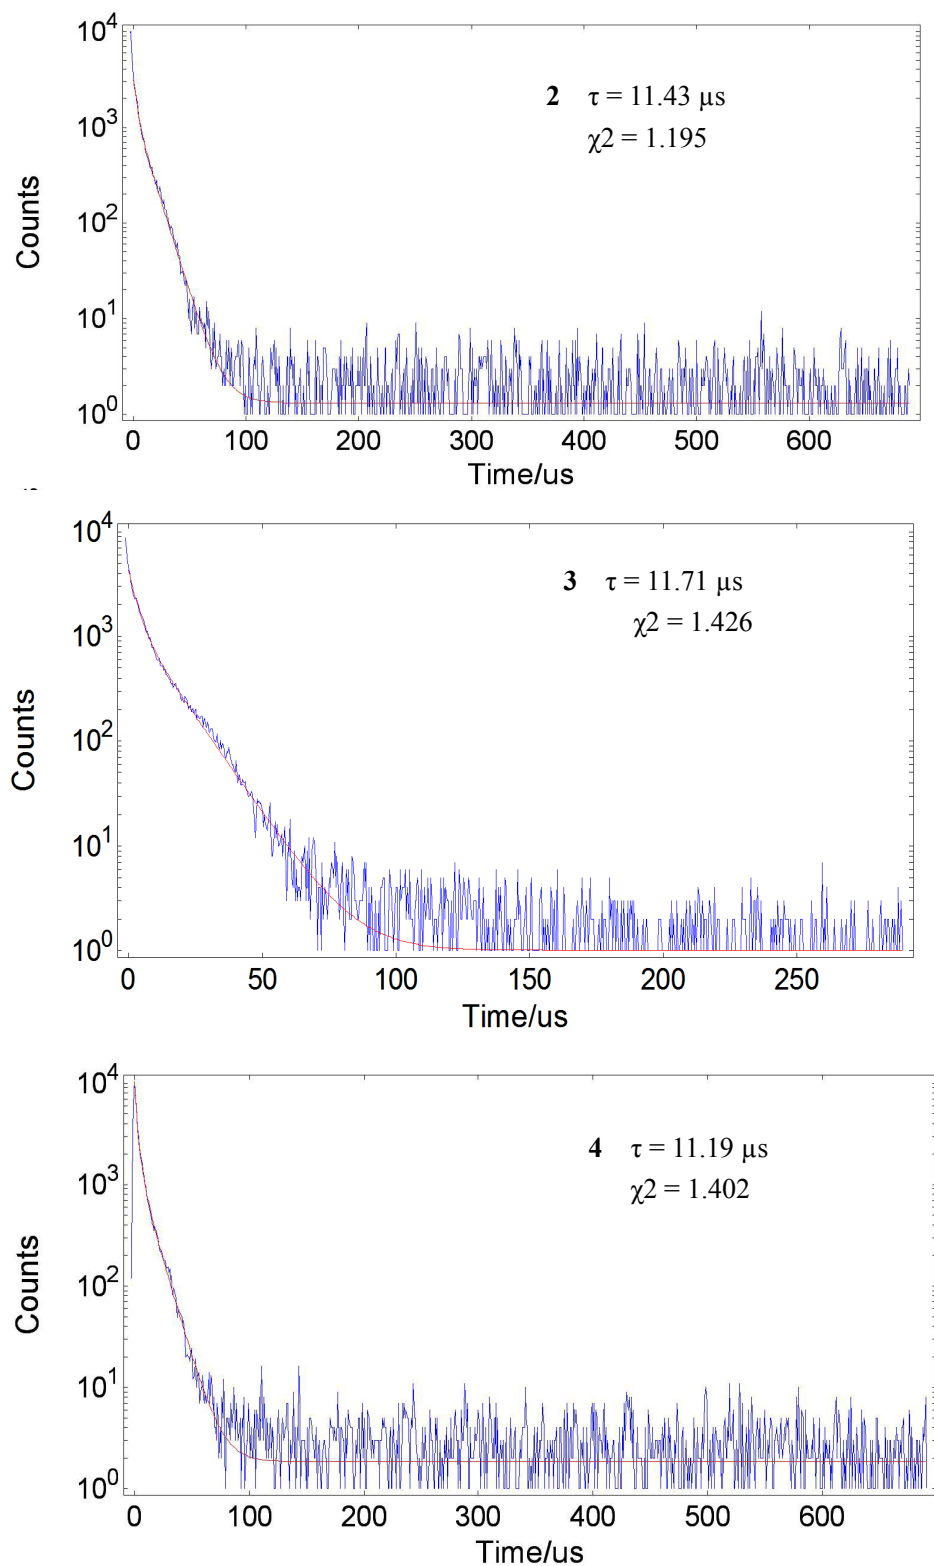

Fig. S3 The decay curves for BTM and compounds 1-4.

Table S1 Selected bond lengths (Å) and angles (°) for compounds **1-6**.

| <b>1</b>                                |            |                                         |            |
|-----------------------------------------|------------|-----------------------------------------|------------|
| Zn1—O4                                  | 2.028(6)   | Zn2—N5 <sup>i</sup>                     | 2.171(4)   |
| Zn1—O1                                  | 2.127(7)   | Zn2—N5 <sup>ii</sup>                    | 2.171(4)   |
| Zn1—N4                                  | 2.163(5)   | Zn2—N5                                  | 2.171(4)   |
| Zn1—N4 <sup>i</sup>                     | 2.163(5)   | Zn3—O2 <sup>iv</sup>                    | 2.081(6)   |
| Zn1—N2 <sup>i</sup>                     | 2.185(5)   | Zn3—O2                                  | 2.081(6)   |
| Zn1—N2                                  | 2.185(5)   | Zn3—N1 <sup>i</sup>                     | 2.184(4)   |
| Zn2—O3 <sup>ii</sup>                    | 2.081(6)   | Zn3—N1 <sup>v</sup>                     | 2.184(4)   |
| Zn2—O3                                  | 2.081(6)   | Zn3—N1                                  | 2.184(4)   |
| Zn2—N5 <sup>iii</sup>                   | 2.171(4)   | Zn3—N1 <sup>iv</sup>                    | 2.184(4)   |
| O4—Zn1—O1                               | <b>180</b> | N5 <sup>iii</sup> —Zn2—N5 <sup>i</sup>  | <b>180</b> |
| O4—Zn1—N4                               | 94.76(9)   | O3 <sup>ii</sup> —Zn2—N5 <sup>ii</sup>  | 93.13(11)  |
| O1—Zn1—N4                               | 84.73(9)   | O3—Zn2—N5 <sup>ii</sup>                 | 86.87(11)  |
| O4—Zn1—N4 <sup>i</sup>                  | 94.76(9)   | N5 <sup>iii</sup> —Zn2—N5 <sup>ii</sup> | 89.53(13)  |
| O1—Zn1—N4 <sup>i</sup>                  | 84.73(9)   | N5 <sup>i</sup> —Zn2—N5 <sup>ii</sup>   | 90.47(13)  |
| N4—Zn1—N4 <sup>i</sup>                  | 91.00(16)  | O3 <sup>ii</sup> —Zn2—N5                | 86.87(11)  |
| O4—Zn1—N2 <sup>i</sup>                  | 88.60(9)   | O3—Zn2—N5                               | 93.13(11)  |
| O1—Zn1—N2 <sup>i</sup>                  | 91.94(9)   | N5 <sup>iii</sup> —Zn2—N5               | 90.47(13)  |
| N4—Zn1—N2 <sup>i</sup>                  | 90.28(16)  | N5 <sup>i</sup> —Zn2—N5                 | 89.53(13)  |
| N4 <sup>i</sup> —Zn1—N2 <sup>i</sup>    | 176.30(15) | N5 <sup>ii</sup> —Zn2—N5                | <b>180</b> |
| O4—Zn1—N2                               | 88.60(9)   | O2 <sup>iv</sup> —Zn3—O2                | 179.99(18) |
| O1—Zn1—N2                               | 91.94(9)   | O2 <sup>iv</sup> —Zn3—N1 <sup>ii</sup>  | 86.27(11)  |
| N4—Zn1—N2                               | 176.30(15) | O2—Zn3—N1 <sup>i</sup>                  | 93.73(11)  |
| N4 <sup>i</sup> —Zn1—N2                 | 90.28(16)  | O2 <sup>iv</sup> —Zn3—N1 <sup>v</sup>   | 93.73(11)  |
| N2 <sup>i</sup> —Zn1—N2                 | 88.23(15)  | O2—Zn3—N1 <sup>v</sup>                  | 86.27(11)  |
| O3 <sup>ii</sup> —Zn2—O3                | <b>180</b> | N1 <sup>i</sup> —Zn3—N1 <sup>v</sup>    | <b>180</b> |
| O3 <sup>ii</sup> —Zn2—N5 <sup>iii</sup> | 93.13(11)  | O2 <sup>iv</sup> —Zn3—N1                | 86.27(11)  |
| O3—Zn2—N5 <sup>iii</sup>                | 86.87(11)  | O2—Zn3—N1                               | 93.73(11)  |
| O3 <sup>ii</sup> —Zn2—N5 <sup>i</sup>   | 86.87(11)  | N1 <sup>i</sup> —Zn3—N1                 | 90.34(13)  |
| O3—Zn2—N5 <sup>i</sup>                  | 93.13(11)  |                                         |            |
| <b>2</b>                                |            |                                         |            |
| Cd1—O1                                  | 2.224(5)   | Cd1—N1 <sup>i</sup>                     | 2.354(3)   |
| Cd1—O1 <sup>i</sup>                     | 2.224(5)   | Cd1—N1                                  | 2.354(3)   |
| Cd1—N1 <sup>iii</sup>                   | 2.354(3)   |                                         |            |

|                                          |            |                                        |            |
|------------------------------------------|------------|----------------------------------------|------------|
| O1—Cd1—O1 <sup>i</sup>                   | 179.98(20) | N1 <sup>ii</sup> —Cd1—N1 <sup>i</sup>  | 37.65(8)   |
| O1—Cd1—N1 <sup>ii</sup>                  | 89.47(1)   | N1 <sup>iii</sup> —Cd1—N1 <sup>i</sup> | 87.90(12)  |
| O1 <sup>i</sup> —Cd1—N1 <sup>ii</sup>    | 90.53(1)   | O1—Cd1—N1                              | 93.35(9)   |
| O1—Cd1—N1 <sup>iii</sup>                 | 93.35(9)   | O1 <sup>i</sup> —Cd1—N1                | 86.65(9)   |
| O1 <sup>i</sup> —Cd1—N1 <sup>iii</sup>   | 86.65(9)   | N1 <sup>ii</sup> —Cd1—N1               | 142.35(8)  |
| N1 <sup>iii</sup> —Cd1—N1 <sup>iii</sup> | 50.26(8)   | N1 <sup>iii</sup> —Cd1—N1              | 92.10(12)  |
| O1—Cd1—N1 <sup>i</sup>                   | 86.65(9)   | N1 <sup>i</sup> —Cd1—N1                | 180.00(12) |
| O1 <sup>i</sup> —Cd1—N1 <sup>i</sup>     | 93.35(9)   |                                        |            |

### 3

|            |            |                           |            |
|------------|------------|---------------------------|------------|
| Zn1—N7     | 2.093(7)   | Zn2—O3                    | 2.119(7)   |
| Zn1—O2     | 2.135(7)   | Zn2—N10 <sup>i</sup>      | 2.118(7)   |
| Zn1—N2     | 2.146(6)   | Zn2—N1                    | 2.145(7)   |
| Zn1—N13    | 2.160(7)   | Zn2—N14                   | 2.157(7)   |
| Zn1—N4     | 2.175(7)   | Zn2—O4                    | 2.176(5)   |
| Zn1—O1     | 2.217(6)   | Zn2—N5                    | 2.177(7)   |
| N7—Zn1—O2  | 89.93(23)  | O3—Zn2—N10 <sup>i</sup>   | 91.42(23)  |
| N7—Zn1—N2  | 93.76(23)  | O3—Zn2—N1                 | 86.87(23)  |
| O2—Zn1—N2  | 89.11(23)  | N10 <sup>i</sup> —Zn2—N1  | 95.47(23)  |
| N7—Zn1—N13 | 94.63(23)  | O3—Zn2—N14                | 174.83(23) |
| O2—Zn1—N13 | 173.78(23) | N10 <sup>i</sup> —Zn2—N14 | 90.15(23)  |
| N2—Zn1—N13 | 94.79(23)  | N1—Zn2—N14                | 97.89(23)  |
| N7—Zn1—N4  | 176.67(23) | O3—Zn2—O4                 | 86.02(23)  |
| O2—Zn1—N4  | 88.32(23)  | N10 <sup>i</sup> —Zn2—O4  | 87.31(22)  |
| N2—Zn1—N4  | 89.04(23)  | N1—Zn2—O4                 | 172.42(22) |
| N13—Zn1—N4 | 86.91(23)  | N14—Zn2—O4                | 89.14(22)  |
| N7—Zn1—O1  | 89.13(23)  | O3—Zn2—N5                 | 94.03(23)  |
| O2—Zn1—O1  | 88.01(23)  | N10 <sup>i</sup> —Zn2—N5  | 173.24(23) |
| N2—Zn1—O1  | 175.91(23) | N1—Zn2—N5                 | 88.84(23)  |
| N13—Zn1—O1 | 87.84(23)  | N14—Zn2—N5                | 84.08(23)  |
| N4—Zn1—O1  | 87.98(23)  | O4—Zn2—N5                 | 89.06(22)  |

### 4

|                        |            |                           |           |
|------------------------|------------|---------------------------|-----------|
| Cd1—N7                 | 2.266(9)   | Cd2—O4                    | 2.267(8)  |
| Cd1—O1                 | 2.300(8)   | Cd2—N10 <sup>ii</sup>     | 2.274(8)  |
| Cd1—N4 <sup>i</sup>    | 2.335(8)   | Cd2—N2                    | 2.333(8)  |
| Cd1—N13                | 2.347(8)   | Cd2—O3                    | 2.334(8)  |
| Cd1—N1                 | 2.350(8)   | Cd2—N14                   | 2.340(8)  |
| Cd1—O2                 | 2.369(7)   | Cd2—N5 <sup>i</sup>       | 2.347(8)  |
| N7—Cd1—O1              | 89.58(29)  | O4—Cd2—N10 <sup>ii</sup>  | 90.96(27) |
| N7—Cd1—N4 <sup>i</sup> | 177.38(29) | O4—Cd2—N2                 | 90.14(26) |
| O1—Cd1—N4 <sup>i</sup> | 87.80(28)  | N10 <sup>ii</sup> —Cd2—N2 | 96.03(28) |
| N7—Cd1—N13             | 98.99(29)  | O4—Cd2—O3                 | 79.60(26) |
| O1—Cd1—N13             | 168.91(27) | N10 <sup>ii</sup> —Cd2—O3 | 87.92(28) |

|                          |            |                                        |            |
|--------------------------|------------|----------------------------------------|------------|
| N4 <sup>i</sup> —Cd1—N13 | 83.59(27)  | N2—Cd2—O3                              | 169.09(28) |
| N7—Cd1—N1                | 91.33(29)  | O4—Cd2—N14                             | 169.10(27) |
| O1—Cd1—N1                | 88.62(28)  | N10 <sup>ii</sup> —Cd2—N14             | 88.42(28)  |
| N4 <sup>i</sup> —Cd1—N1  | 88.72(28)  | N2—Cd2—N14                             | 100.75(28) |
| N13—Cd1—N1               | 98.13(27)  | O3—Cd2—N14                             | 89.50(27)  |
| N7—Cd1—O2                | 94.27(27)  | O4—Cd2—N5 <sup>i</sup>                 | 98.31(26)  |
| O1—Cd1—O2                | 87.85(27)  | N10 <sup>ii</sup> —Cd2—N5 <sup>i</sup> | 169.27(28) |
| N4 <sup>i</sup> —Cd1—O2  | 85.53(26)  | N2—Cd2—N5 <sup>i</sup>                 | 89.38(28)  |
| N13—Cd1—O2               | 84.53(27)  | O3—Cd2—N5 <sup>i</sup>                 | 88.45(28)  |
| N1—Cd1—O2                | 173.36(26) | N14—Cd2—N5 <sup>i</sup>                | 81.45(27)  |

5

|             |            |             |            |
|-------------|------------|-------------|------------|
| Cu1—N13     | 1.997(7)   | Cu3—N29     | 1.958(7)   |
| Cu1—O1      | 2.035(7)   | Cu3—N28     | 2.218(7)   |
| Cu1—N2      | 2.332(10)  | Cu3—N4      | 1.999(7)   |
| Cu1—N7      | 2.026(10)  | Cu3—N10     | 2.072(7)   |
| Cu1—N32     | 2.051(10)  | Cu3—N35     | 2.197(13)  |
| Cu1—N8      | 2.523(10)  | Cu3—O2      | 2.571(10)  |
| Cu2—N25     | 2.016(7)   | Cu4—N34     | 2.020(13)  |
| Cu2—O1      | 2.004(7)   | Cu4—N5      | 2.116(7)   |
| Cu2—N20     | 1.692(7)   | Cu4—N23     | 2.150(7)   |
| Cu2—N31     | 1.970(7)   | Cu4—N17     | 2.061(7)   |
| Cu2—N19     | 2.540(7)   | Cu4—N16     | 2.167(7)   |
| Cu2—N1      | 2.541(7)   | Cu4—O2      | 2.601(10)  |
| N13—Cu1—O1  | 174.28(29) | N29—Cu3—N10 | 95.52(29)  |
| N13—Cu1—N2  | 92.24(29)  | N4—Cu3—N10  | 90.04(29)  |
| O1—Cu1—N2   | 82.04(27)  | N29—Cu3—N35 | 91.02(38)  |
| N34—Cu2—N5  | 86.64(39)  | N4—Cu3—N35  | 86.70(38)  |
| N34—Cu2—N23 | 89.24(36)  | N10—Cu3—N35 | 91.28(35)  |
| N5—Cu2—N23  | 91.06(28)  | N29—Cu3—O2  | 85.71(21)  |
| N34—Cu2—O2  | 93.83(31)  | N4—Cu3—O2   | 88.84(21)  |
| N5—Cu2—O2   | 87.88(20)  | N10—Cu3—O2  | 176.92(21) |
| N23—Cu2—O2  | 176.69(20) | N35—Cu3—O2  | 91.52(28)  |
| N29—Cu3—N4  | 174.04(30) |             |            |

6

|                         |            |                        |            |
|-------------------------|------------|------------------------|------------|
| Co1—N8                  | 2.111(5)   | Co2—O3                 | 2.099(5)   |
| Co1—N5 <sup>i</sup>     | 58.100(5)  | Co2—N2                 | 2.108(5)   |
| Co1—N3                  | 2.160(5)   | Co2—N6 <sup>i</sup>    | 58.017(5)  |
| Co2—O2                  | 2.081(5)   | Co2—O1                 | 2.130(4)   |
| Co2—N9                  | 2.095(5)   |                        |            |
| N8—Co1—N5 <sup>i</sup>  | 101.23(13) | O2—Co2—N6 <sup>i</sup> | 57.07(13)  |
| N8—Co1—N3               | 90.57(18)  | N9—Co2—N6 <sup>i</sup> | 125.73(13) |
| N5 <sup>i</sup> —Co1—N3 | 14.03(13)  | O3—Co2—N6 <sup>i</sup> | 57.39(13)  |
| O2—Co2—N9               | 175.81(19) | N2—Co2—N6 <sup>i</sup> | 51.38(13)  |
| O2—Co2—O3               | 88.95(19)  | O2—Co2—O1              | 88.21(18)  |



|           |           |                         |            |
|-----------|-----------|-------------------------|------------|
| N9—Co2—O3 | 90.47(18) | N9—Co2—O1               | 87.62(18)  |
| O2—Co2—N2 | 92.70(19) | O3—Co2—O1               | 89.01(18)  |
| N9—Co2—N2 | 91.45(19) | N2—Co2—O1               | 178.76(18) |
| O3—Co2—N2 | 90.17(19) | N6 <sup>i</sup> —Co2—O1 | 128.71(11) |

Symmetry transformations used to generate equivalent atoms:

- (1) (i)  $x, -y, z$ ; (ii)  $1-x, -y, 2-z$ ; (iii)  $1-x, y, 2-z$ ; (iv)  $1-x, -y, 1-z$ ; (v)  $1-x, y, 1-z$ ;  
 (2) (i)  $1.5-x, 2.5-y, 1.5-z$ ; (ii)  $1.5-x, 1+y, 1.5-z$ ; (iii)  $x, 2.5-y, z$ ; (iv)  $2-x, y, z$ ;  
 (3) (i)  $x, y, -1+z$ ;  
 (4) (i)  $1+x, y, z$ ; (ii)  $x, 1+y, z$ ; (iii)  $-1+x, y, z$ ;  
 (6) (i)  $-1-x, -y, z$ ;

Table S2 The overall formula, formula weight, density and F(000) for **1** and **2**.

| compounds                 | <b>1</b>                      | <b>2</b>               |
|---------------------------|-------------------------------|------------------------|
| Formula                   | $C_{18}H_{20.5}N_7O_{7.25}Zn$ | $C_{18}H_{20}N_7O_6Cd$ |
| formula weight            | 516.30                        | 542.82                 |
| crystal system            | monoclinic                    | orthorhombic           |
| space group               | $C2/m$                        | $Imma$                 |
| $a$ (Å)                   | 20.264(2)                     | 8.3699(14)             |
| $b$ (Å)                   | 15.8241(16)                   | 16.482(3)              |
| $c$ (Å)                   | 16.1914(16)                   | 17.686(3)              |
| $\alpha$ (°)              | 90                            | 90                     |
| $\beta$ (°)               | 113.573(3)                    | 90                     |
| $\gamma$ (°)              | 90                            | 90                     |
| $V$ (Å <sup>3</sup> )     | 4758.7(8)                     | 2439.8(7)              |
| $Z$                       | 8                             | 4                      |
| $D_c$ , g/cm <sup>3</sup> | 1.441                         | 1.478                  |
| $\mu$ , mm <sup>-1</sup>  | 1.085                         | 0.940                  |
| F(000)                    | 2123                          | 1092                   |
